# Supplementary material
Source: PubMed Central journal article supplement (PMC4313533)

Figure S1

A

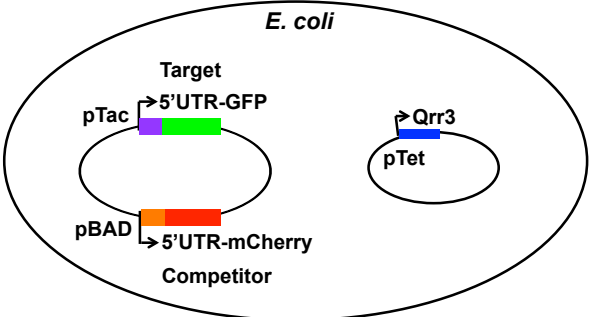

B

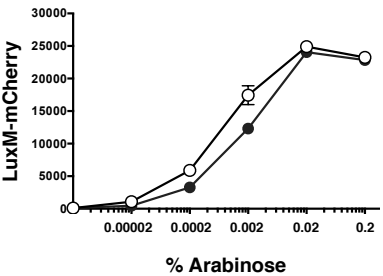

E

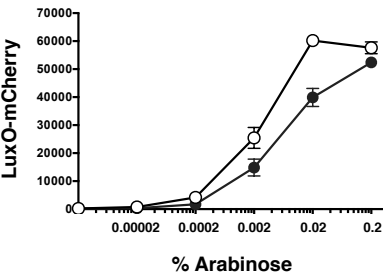

H

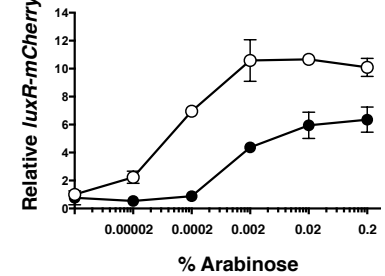

K

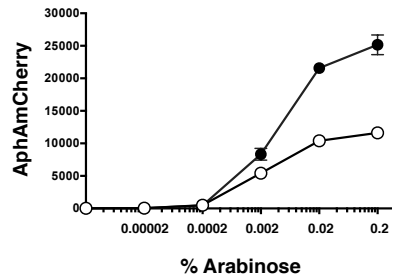

C

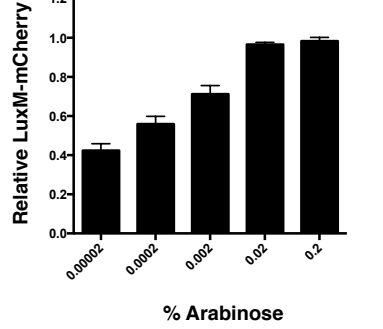

F

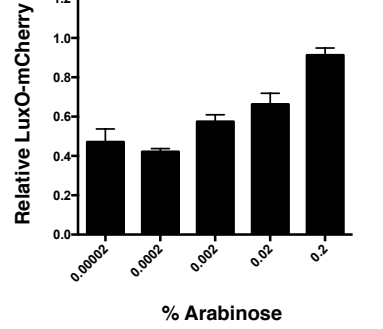

I

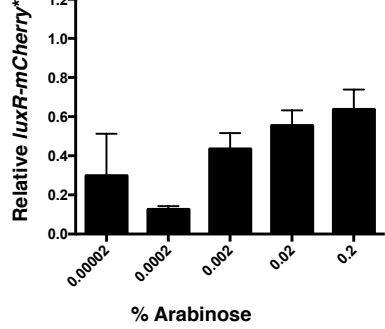

L

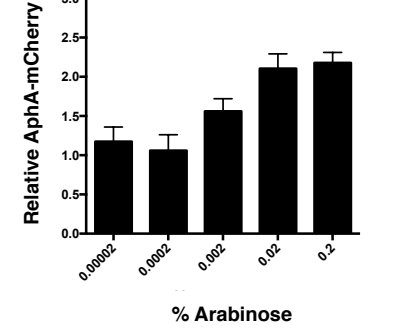

D

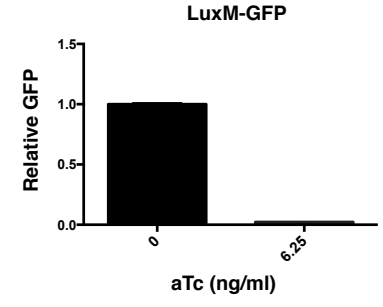

G

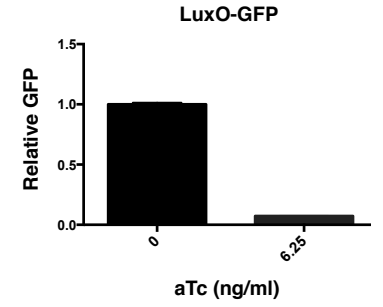

J

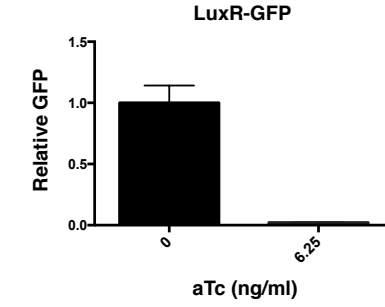

M

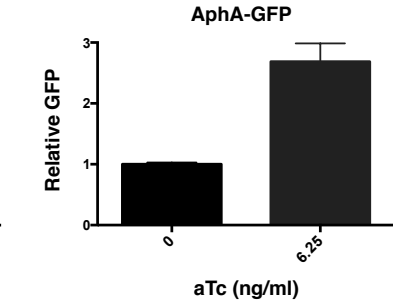

Supplement: NIHMS645764-supplement-1.pdf [file NIHMS645764-supplement-1.pdf]

**Figure S2**

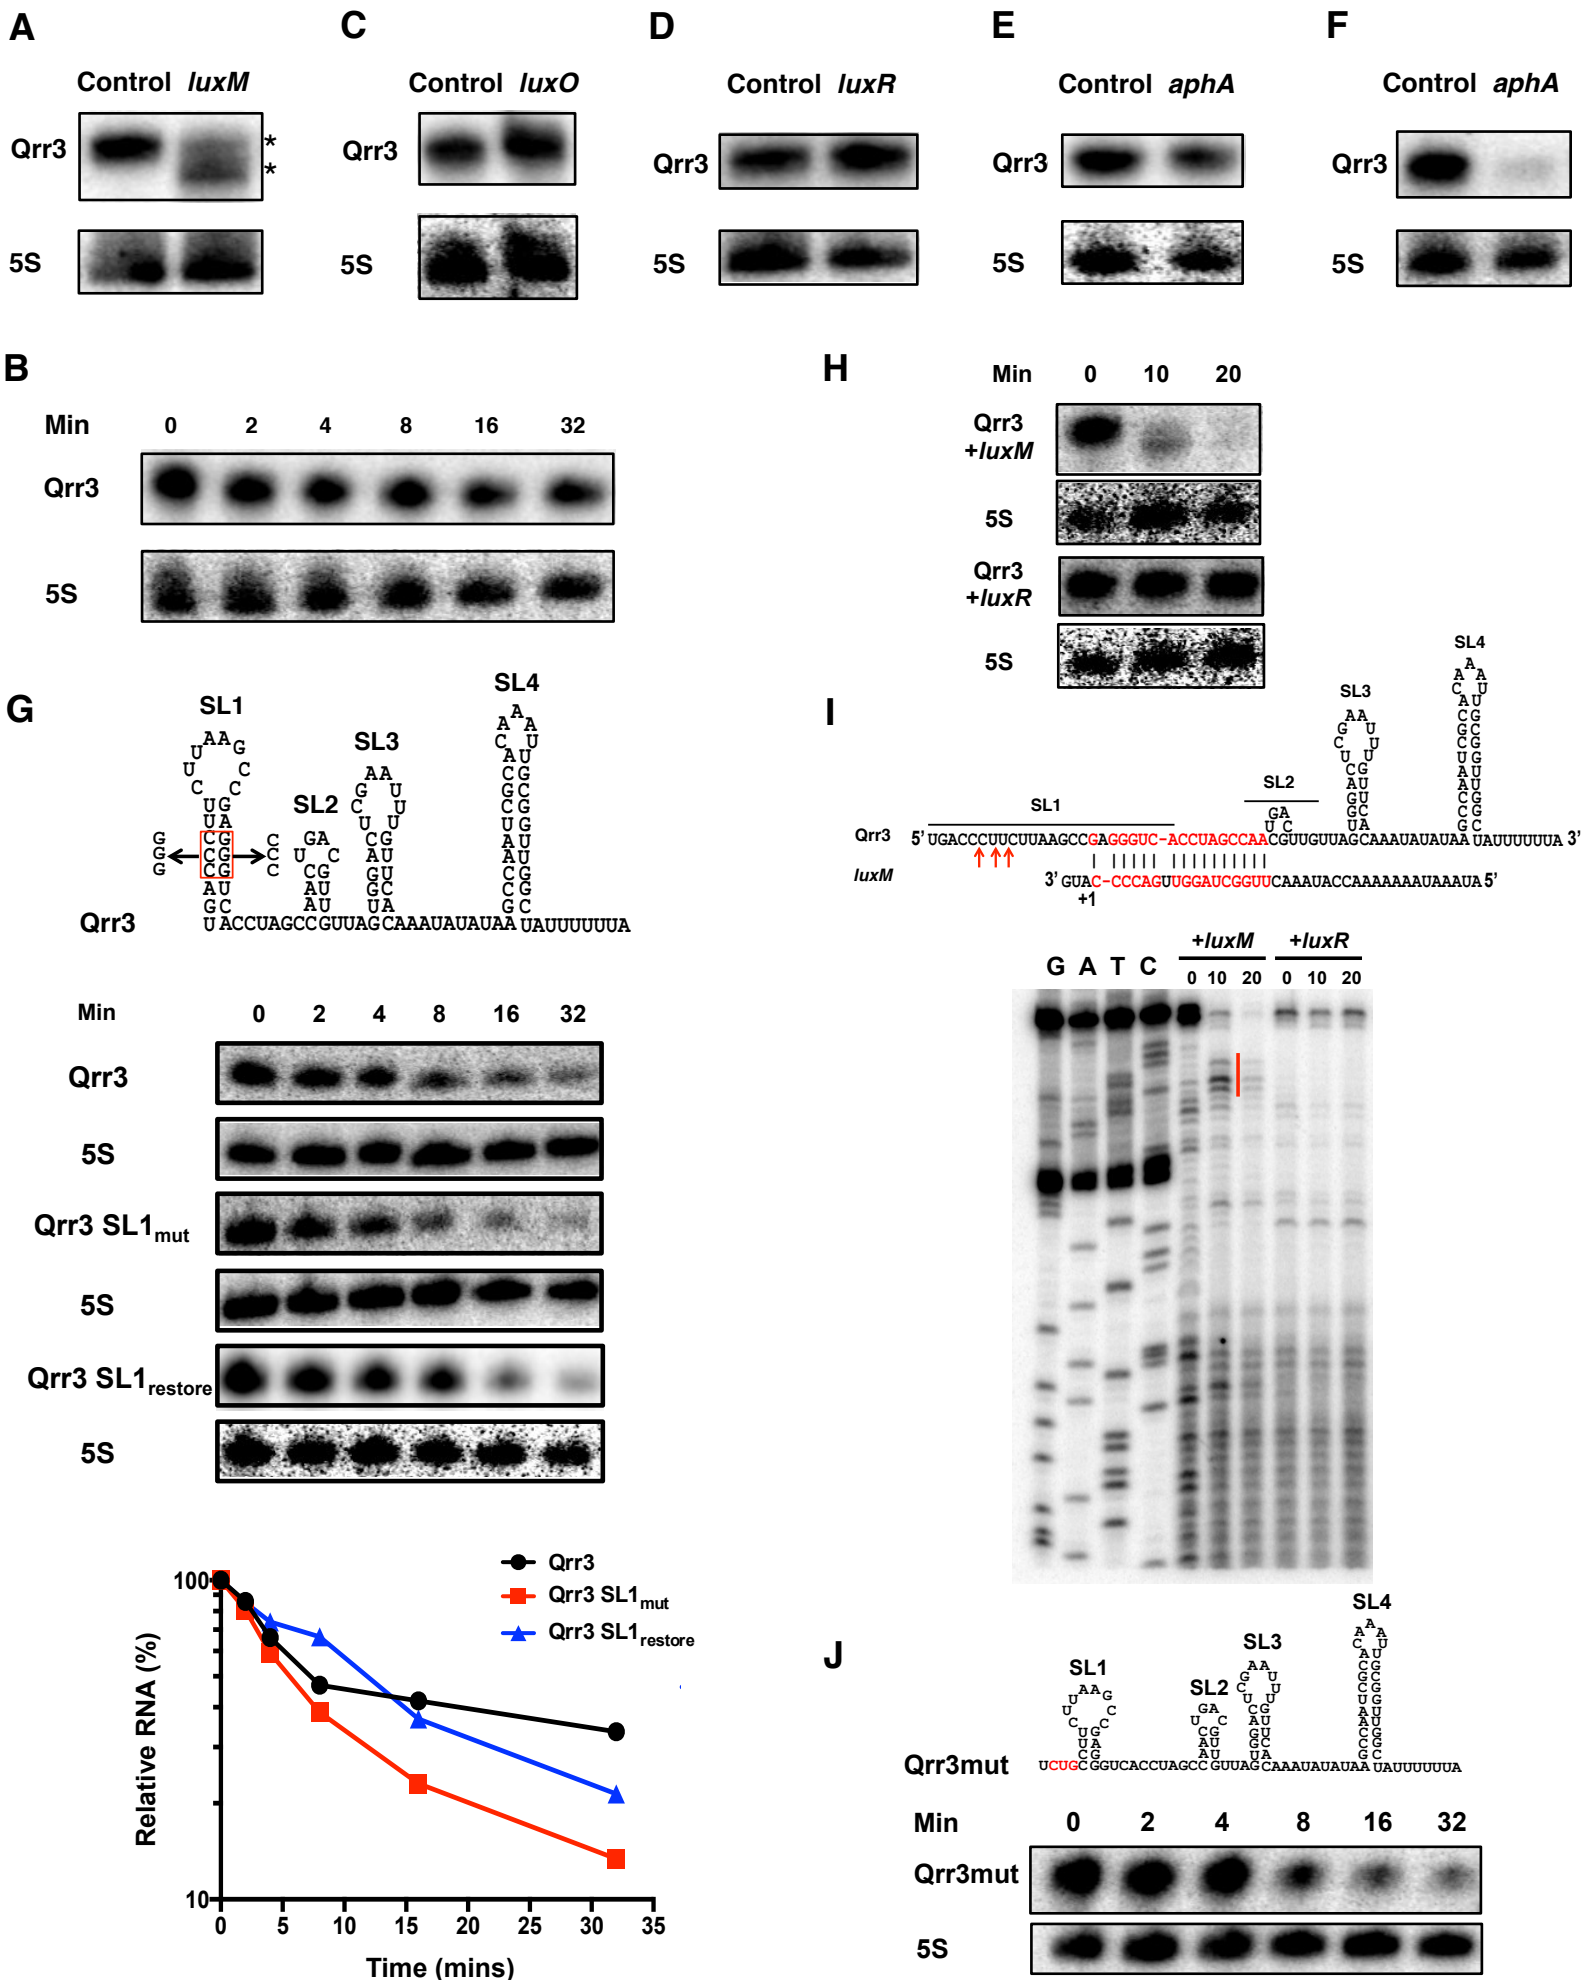

Supplement: NIHMS645764-supplement-2.pdf [file NIHMS645764-supplement-2.pdf]

**Figure S3**

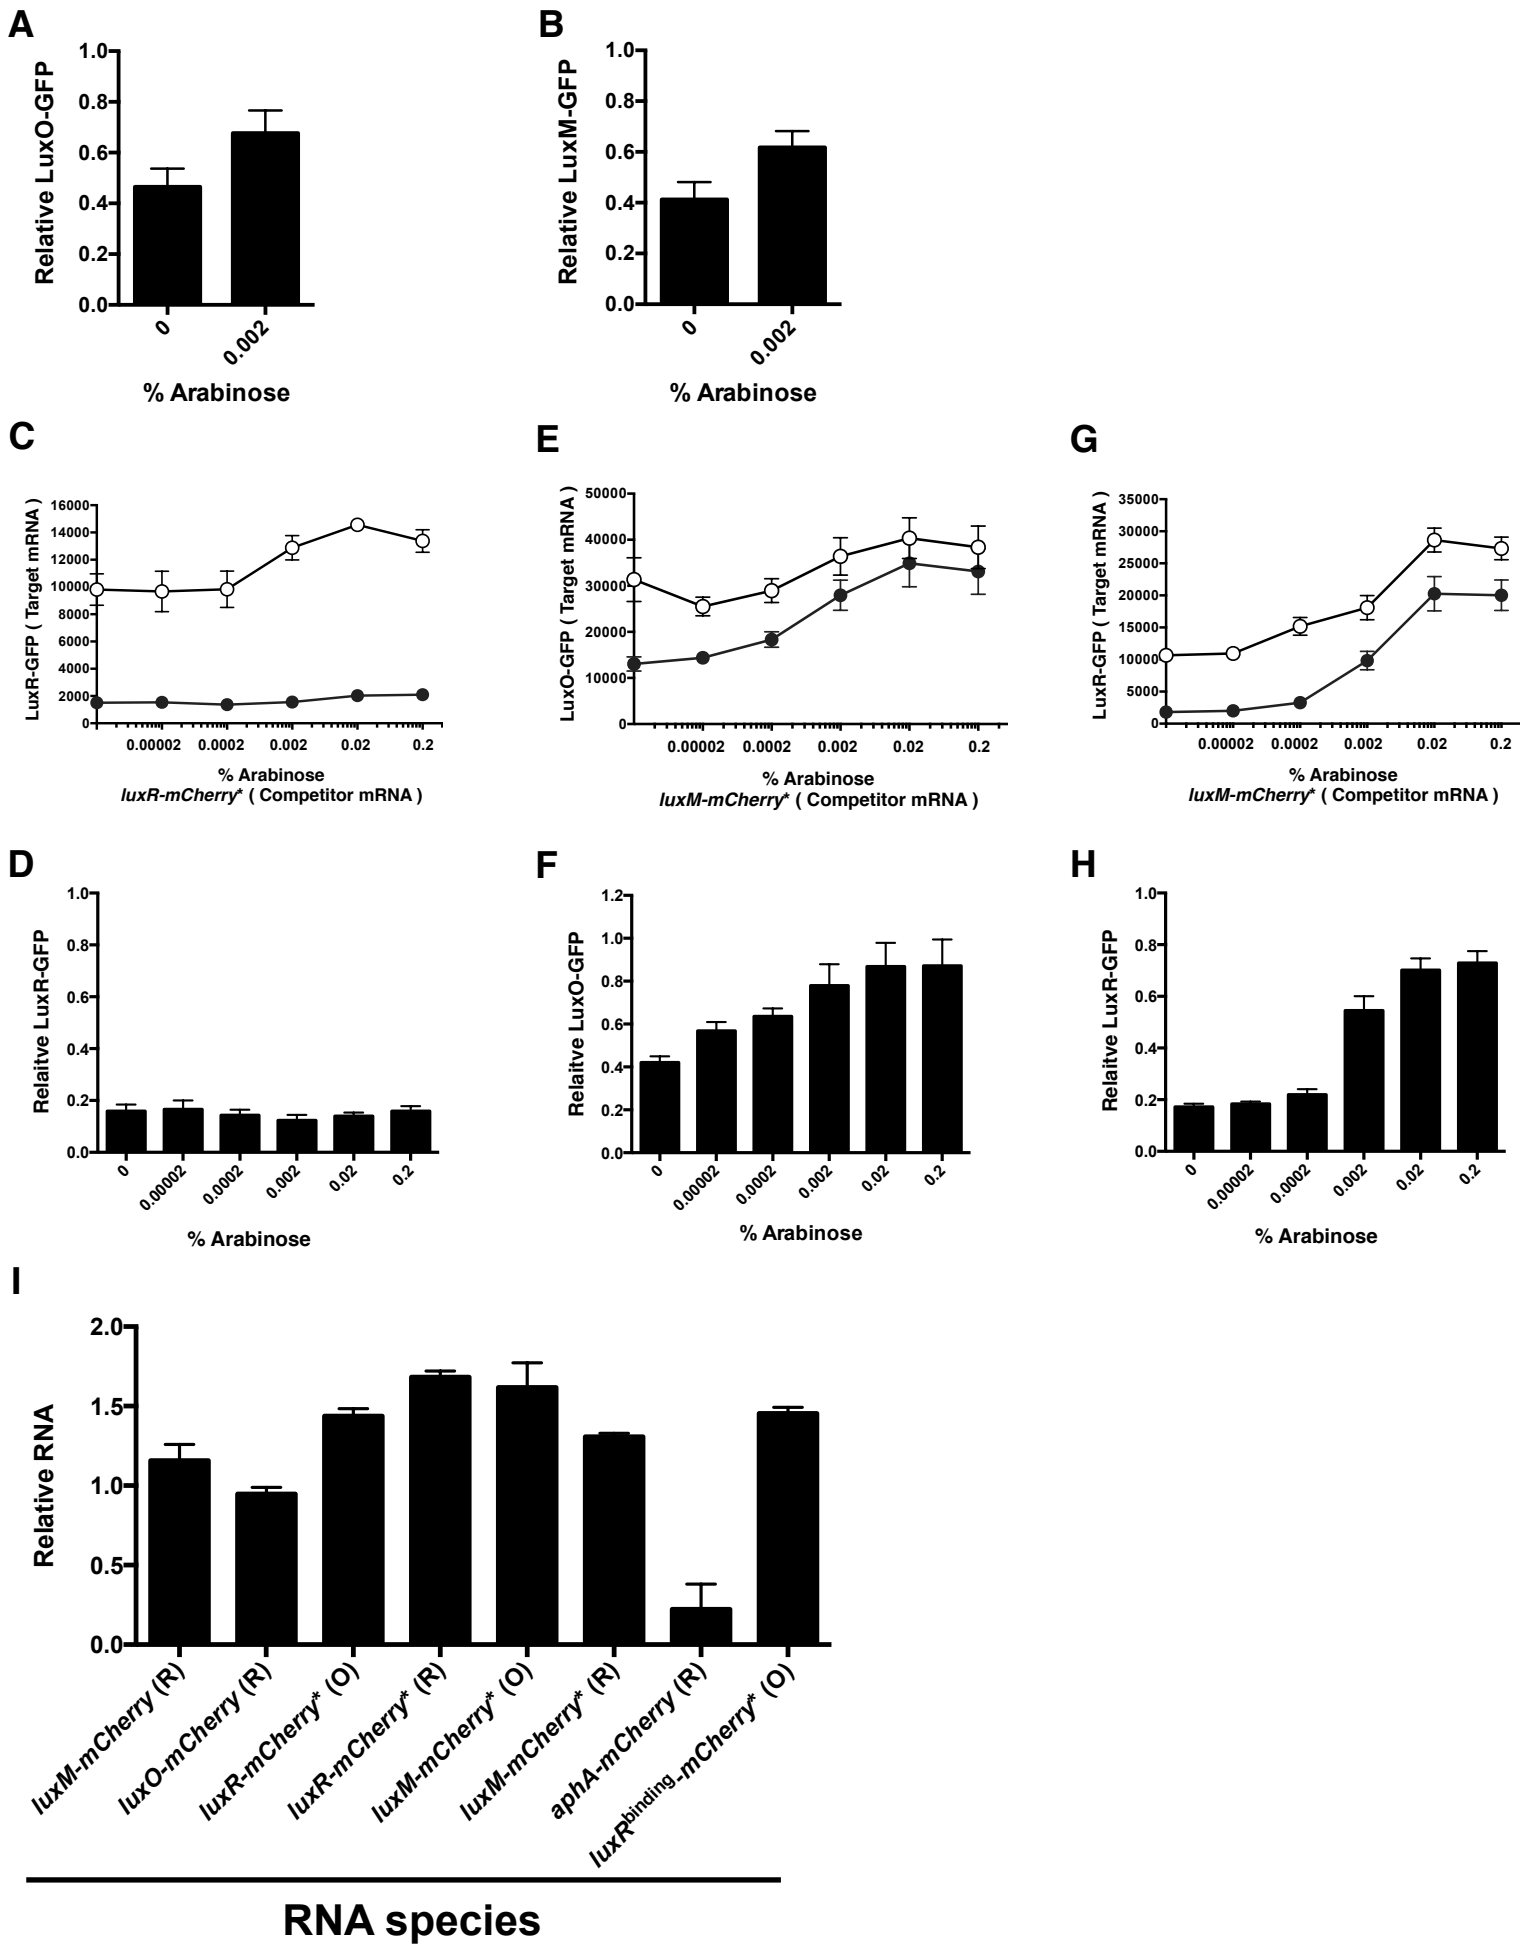

Supplement: NIHMS645764-supplement-3.pdf [file NIHMS645764-supplement-3.pdf]

Figure S4

A

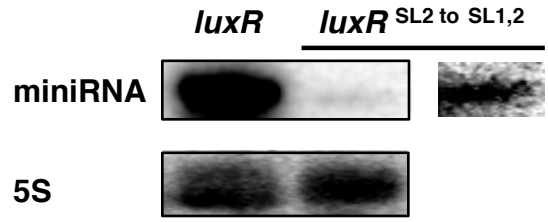

B

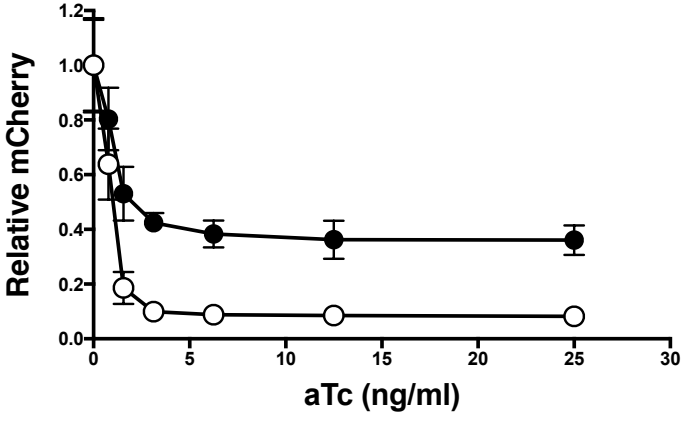

C

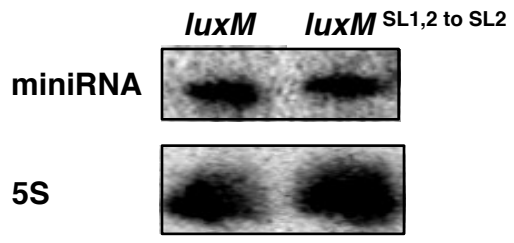

D

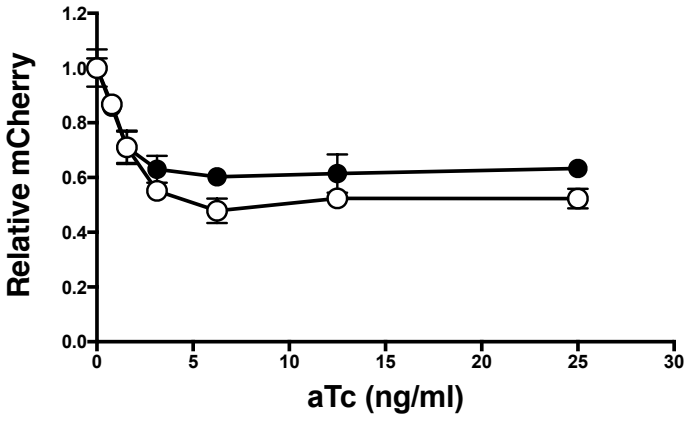

E

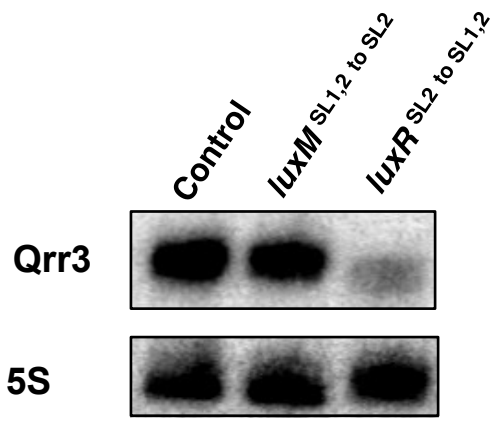

Supplement: NIHMS645764-supplement-4.pdf [file NIHMS645764-supplement-4.pdf]

Figure S5

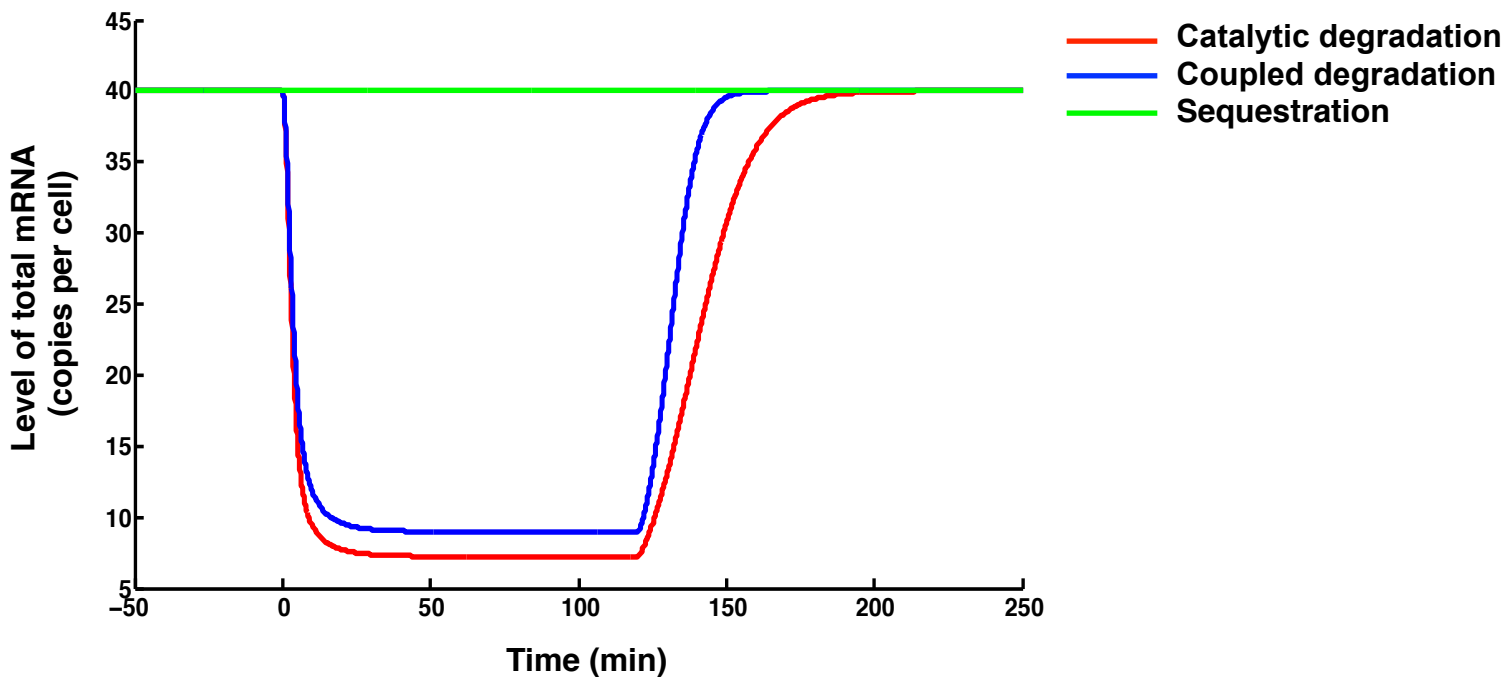

Supplement: NIHMS645764-supplement-5.pdf [file NIHMS645764-supplement-5.pdf]

Figure S6

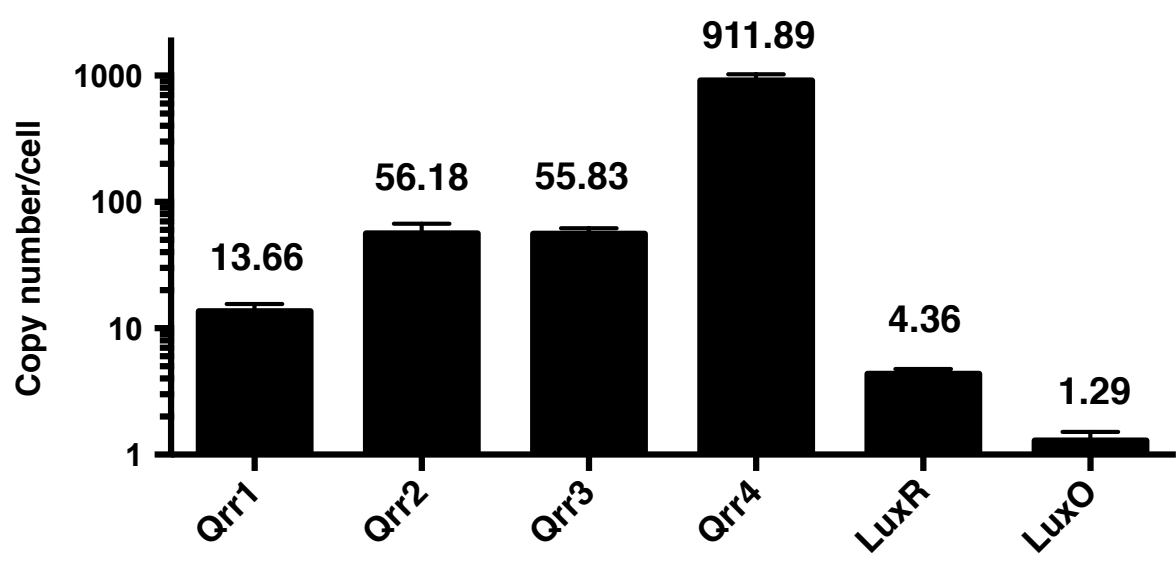

Supplement: NIHMS645764-supplement-6.pdf [file NIHMS645764-supplement-6.pdf]

Figure S7

A

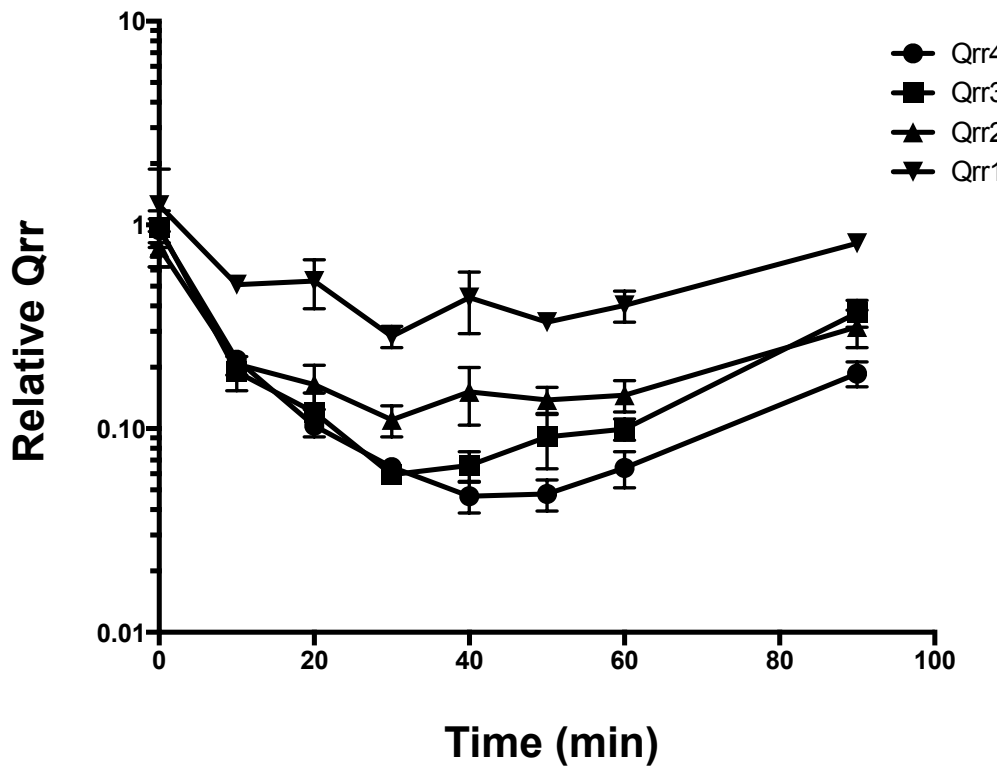

B

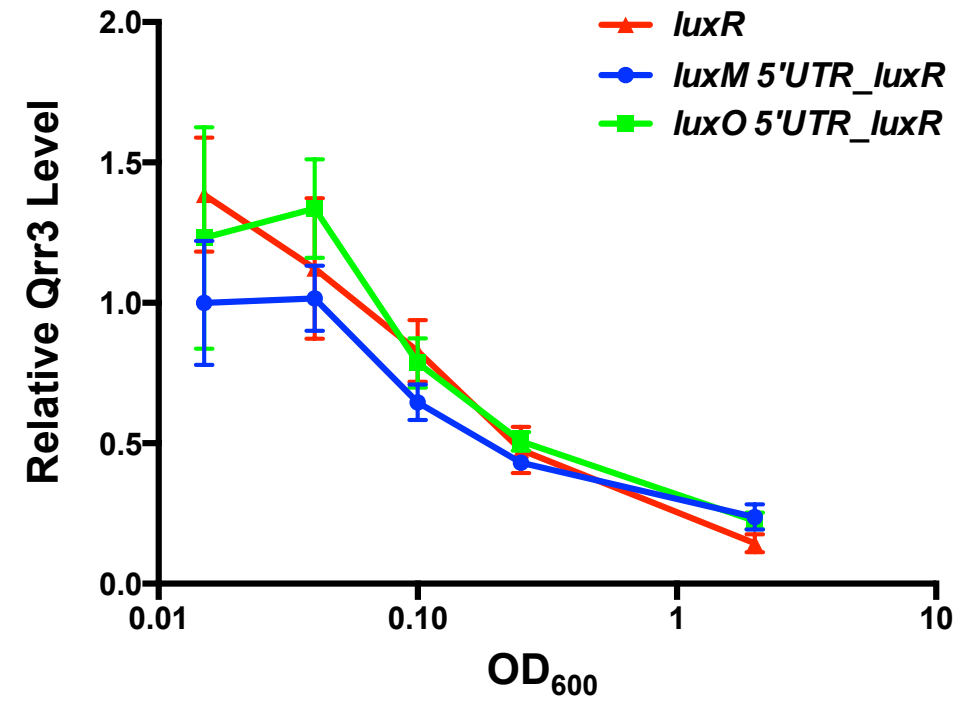

Supplement: NIHMS645764-supplement-7.pdf [file NIHMS645764-supplement-7.pdf]
